# Supplementary figures and images for: Incongruent Expression of Brain-Derived Neurotrophic Factor and Cortisol in Schizophrenia: Results from a Randomized Controlled Trial of Laughter Intervention
Source: PubMed Central journal article supplement — Psychiatry Investig. 2020 Dec 11;17(12):1191–9. doi: 10.30773/pi.2020.0269 (PMC8560332; doi:10.30773/pi.2020.0269), 2020-12-11

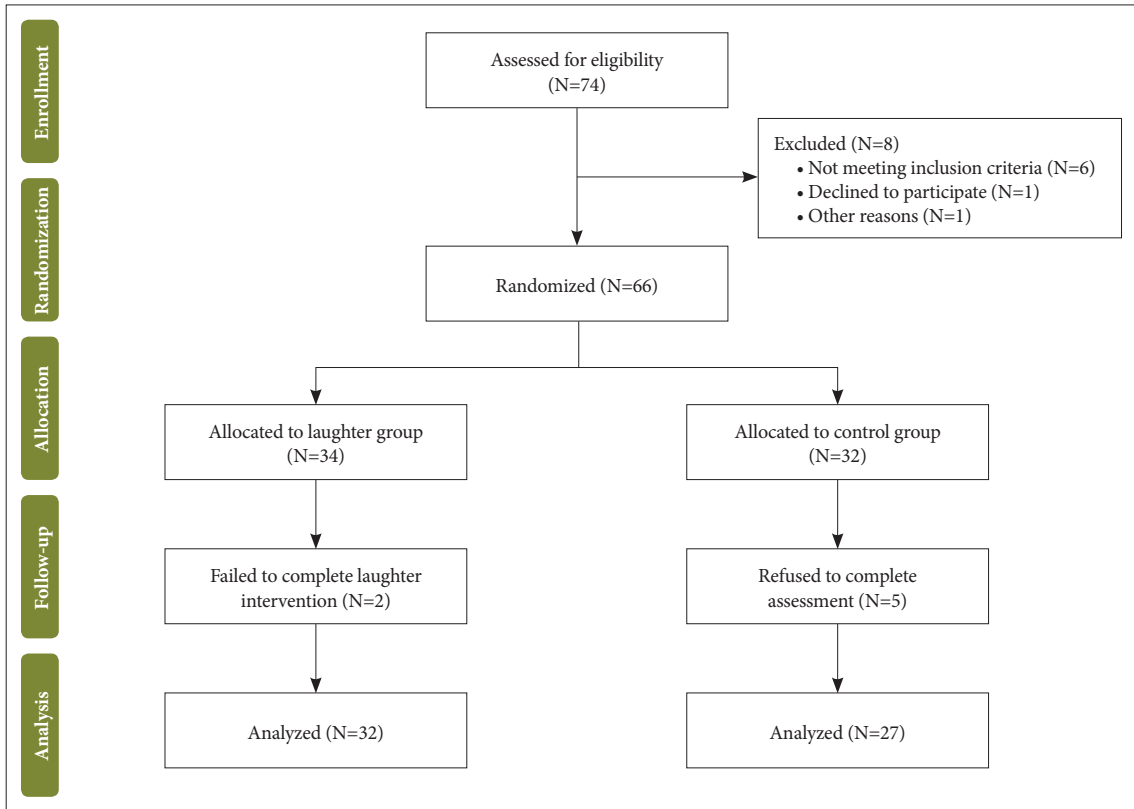

**Supplementary Figure 1.** CONSORT diagram of the trial.

Supplement: pi-2020-0269-suppl.pdf [file pi-2020-0269-suppl.pdf]
